# Supplementary material
Source: publisher figshare collection journal article supplement (https://tandf.figshare.com/ndownloader/files/12270167)

**Fig. S1.** a. The inhibitory mode of strain ZV261 to *M*. *Fructicola* on a sealed plate. b. The antagonistic activity of crude chitinase from *E*. *coli* BL21- chitinase and fermentation supernatant of ZL261 to *M*. *Fructicola*. The chitinase of ZL261 was cloned into pET-28a (+) and prokaryotic expressed in *E*. *coli* BL21 and generate BL21- chitinase according to Li et al., (2017). The results indicated that the antifungal substance of strain ZV261 was neither chitinase nor volatile organic compounds.

b


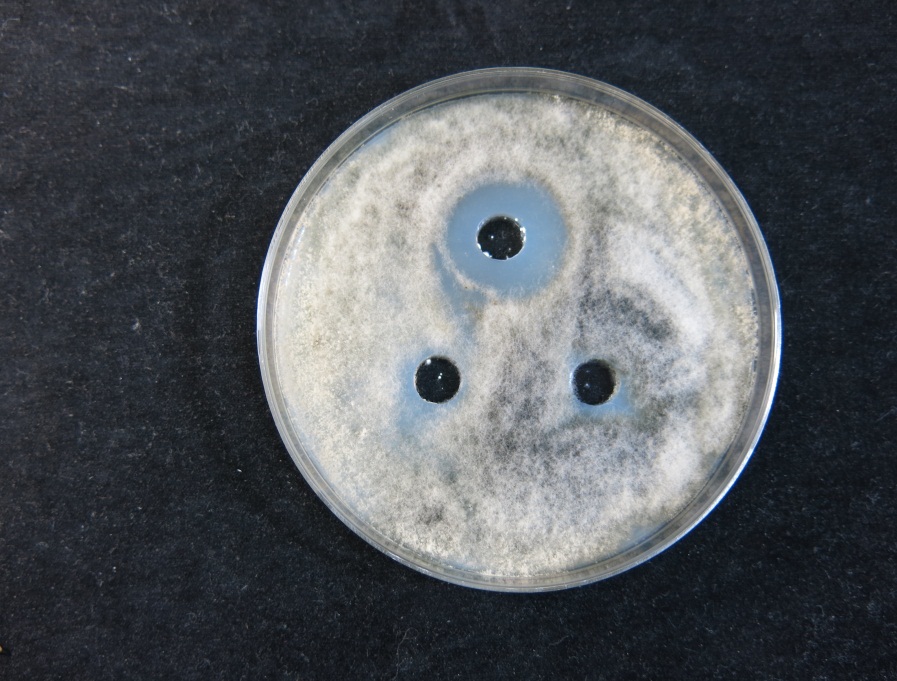


**Crude chitinase**

**Fermentation supernatant**

a


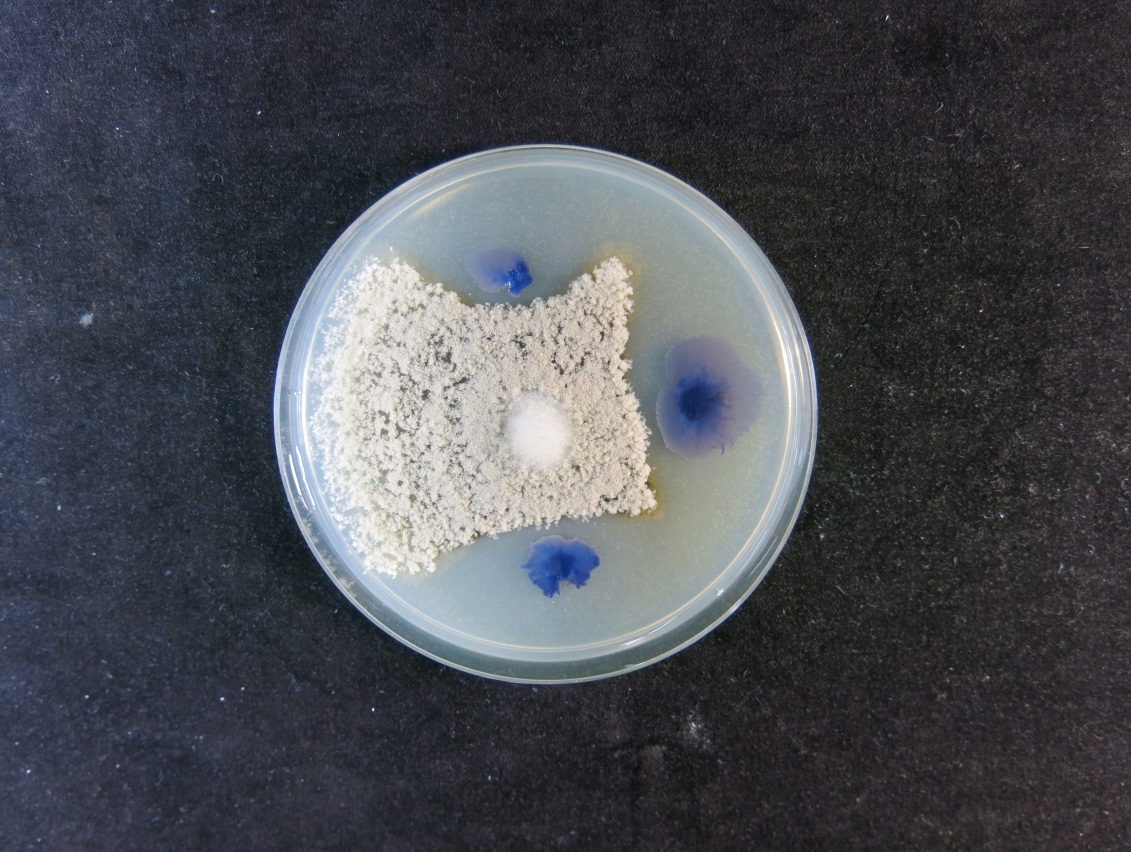

Supplement: Supplementary file 1 [file 12270167]
